# Supplementary material for: The Efficacy of Cognitive Behavioral Therapy to Treat Depression and Anxiety and Improve Quality of Life Among Early-Stage Breast Cancer Patients
Source: PubMed Central journal article supplement — Integr Cancer Ther. 2019 Feb 22;18:1534735419829573. doi: 10.1177/1534735419829573 (PMC6432673; doi:10.1177/1534735419829573), 2019-02-22
Supplement: Appendices.pdf [file Appendices.pdf]

## Appendices

### Appendix 1. Search strategy - Cochrane Library (June 2017)

- #1 MeSH descriptor: [Behavior Therapy] explode all trees
- #2 (cogniti\* near/3 (behavio\* or therap\* or remedation or restructur\* or rehabilitat\* or interven\* or program\* or psychotherap\* or treatment\* or approach\* or technique\*)):ti,ab,kw (Word variations have been searched)
- #3 (behavio?r\* near/3 (modification\* or therap\* or rehabilitat\* or interven\* or program\* or psychotherap\* or treatment\* or approach\* or remedation or technique\*)):ti,ab,kw (Word variations have been searched)
- #4 (cognitive-behavo\* or mindfulness or CBT or DBT or metacognitive or meta-cognitive):ti,ab,kw (Word variations have been searched)
- #5 ((multi systemic or multisystemic) near/2 therap\*):ti,ab,kw (Word variations have been searched)
- #6 MeSH descriptor: [Psychotherapy] this term only
- #7 MeSH descriptor: [Imagery (Psychotherapy)] explode all trees
- #8 MeSH descriptor: [Psychotherapy, Rational-Emotive] explode all trees
- #9 MeSH descriptor: [Feedback, Psychological] this term only
- #10 MeSH descriptor: [Biofeedback, Psychology] explode all trees
- #11 ((aversive or aversion or biofeedback\* or feedback\* or desensiti?ation or relaxation or meditat\*) near/3 (therap\* or interven\* or program\* or treatment\* or approach\* or technique\*)):ti,ab,kw (Word variations have been searched)
- #12 (social skills near/3 train\*):ti,ab,kw (Word variations have been searched)
- #13 #1 or #2 or #3 or #4 or #5 or #6 or #7 or #8 or #9 or #10 or #11 or #12
- #14 MeSH descriptor: [Breast Neoplasms] explode all trees
- #15 MeSH descriptor: [Neoplasms, Ductal, Lobular, and Medullary] explode all trees
- #16 MeSH descriptor: [Breast] explode all trees
- #17 MeSH descriptor: [Neoplasms] explode all trees
- #18 #16 and #17
- #19 (breast\* near/5 (neoplas\* or cancer\* or tumo?r\* or carcinoma\* or adenocarcinoma\* or sarcoma\* or dcis or ductal or infiltrat\* or intraductal\* or lobular

or medullary or malignan\* or lymphoma)):ti,ab,kw (Word variations have been searched)

#20 MeSH descriptor: [Mammary Neoplasms, Animal] explode all trees

#21 (mammar\* near/5 (neoplas\* or cancer\* or tumo?r\* or carcinoma\* or adenocarcinoma\* or sarcoma\* or dcis or ductal or infiltrat\* or intraductal\* or lobular or medullary or malignan\* or lymphoma)):ti,ab,kw (Word variations have been searched)

#22 #14 or #15 or #18 or #19 or #20 or #21

#23 #13 and #22

## **Appendix 2. Search strategy - EMBASE [Excluding MEDLINE Journals], (1974 – June 2017)**

1 exp breast tumor/

2 breast carcinoma/

3 breast adenocarcinoma/

4 (breast\$ adj5 (neoplas\$ or cancer\$ or tumo?r\$ or carcinoma\$ or adenocarcinoma\$ or sarcoma\$ or dcis or ductal or infiltrat\$ or intraductal\$ or lobular or medullary or malignan\$ or lymphoma)).tw.

5 (mammar\$ adj5 (neoplas\$ or cancer\$ or tumo?r\$ or carcinoma\$ or adenocarcinoma\$ or sarcoma\$ or dcis or ductal or infiltrat\$ or intraductal\$ or lobular or medullary or malignan\$ or lymphoma)).tw.

6 or/1-5

7 exp behavior therapy/

8 exp cognitive therapy/

9 psychotherapy/

10 exp adaptive behavior/

11 psychophysiology/

12 exp cognitive behavioral stress management/ or exp cognitive rehabilitation/

13 (cogniti\$ adj3 (behavio\$ or therap\$ or remedation or restructur\$ or rehabilitat\$ or interven\$ or program\$ or psychotherap\$ or treatment\$ or approach\$ or

technique\$)).tw.

14 (behavior?r\$ adj3 (modification\$ or therap\$ or rehabilitat\$ or interven\$ or program\$ or psychotherap\$ or treatment\$ or approach\$ or remedation or technique\$)).tw.

15 (cognitive-behavior\$ or mindfulness or CBT or DBT or metacognitive or meta-cognitive).tw.

16 ((multi systemic or multisystemic) adj2 therap\$).tw.

17 ((aversive or aversion or biofeedback\$ or feedback\$ or desensitization or relaxation or meditat\$) adj3 (therap\$ or interven\$ or program\$ or treatment\$ or approach\$ or technique\$)).tw.

18 (social skills adj3 train\$).tw.

19 or/7-18

20 (clin\$ adj2 trial).mp.

21 ((singl\$ or doubl\$ or trebl\$ or tripl\$) adj (blind\$ or mask\$)).mp.

22 (random\$ adj5 (assign\$ or allocat\$)).mp.

23 randomi\$.mp.

24 crossover.mp.

25 exp randomized-controlled-trial/

26 exp double-blind-procedure/

27 exp crossover-procedure/

28 exp single-blind-procedure/

29 exp randomization/

30 or/20-29

31 6 and 19 and 30

### **Appendix 3. Search strategy -MEDLINE, (1946 –June 2017)**

1 exp Behavior Therapy/

2 (cogniti\$ adj3 (behavior\$ or therap\$ or remedation or restructur\$ or rehabilitat\$ or interven\$ or program\$ or psychotherap\$ or treatment\$ or approach\$ or technique\$)).tw.

3 (behavior?r\$ adj3 (modification\$ or therap\$ or rehabilitat\$ or interven\$ or  
program\$ or psychotherap\$ or treatment\$ or approach\$ or remedation or  
technique\$)).tw.

4 (cognitive-behavior\$ or mindfulness or CBT or DBT or metacognitive or meta-  
cognitive).tw.

5 ((multi systemic or multisystemic) adj2 therap\$).tw.

6 Psychotherapy/

7 "Imagery (Psychotherapy)"/

8 Psychotherapy, Rational-Emotive/

9 Feedback, Psychological/

10 exp Biofeedback, Psychology/

11 ((aversive or aversion or biofeedback\$ or feedback\$ or desensiti?ation or  
relaxation or meditat\$) adj3 (therap\$ or interven\$ or program\$ or treatment\$ or  
approach\$ or technique\$)).tw.

12 (social skills adj3 train\$).tw.

13 or/1-12

14 exp Breast Neoplasms/

15 exp "Neoplasms, Ductal, Lobular, and Medullary"/

16 exp breast/

17 exp neoplasms/

18 16 and 17

19 (breast\$ adj5 (neoplas\$ or cancer\$ or tumor\$ or carcinoma\$ or  
adenocarcinoma\$ or sarcoma\$ or dcis or ductal or infiltrat\$ or intraductal\$ or lobular  
or medullary or malignan\$ or lymphoma)).tw.

20 exp mammary neoplasms/

21 (mammar\$ adj5 (neoplas\$ or cancer\$ or tumor\$ or carcinoma\$ or  
adenocarcinoma\$ or sarcoma\$ or dcis or ductal or infiltrat\$ or intraductal\$ or lobular  
or medullary or malignan\$ or lymphoma)).tw.

22 or/14-15,18-21

23 exp clinical trial/

24 exp randomized controlled trials/  
 25 exp double-blind method/  
 26 exp single-blind method/  
 27 exp cross-over studies/  
 28 randomized controlled trial.pt.  
 29 clinical trial.pt.  
 30 controlled clinical trial.pt.  
 31 (clinic\$ adj2 trial).mp.  
 32 (random\$ adj5 control\$ adj5 trial\$).mp.  
 33 (crossover or cross-over).mp.  
 34 ((singl\$ or double\$ or trebl\$ or tripl\$) adj (blind\$ or mask\$)).mp.  
 35 randomi\$.mp.  
 36 (random\$ adj5 (assign\$ or allocat\$ or assort\$ or reciev\$)).mp.  
 37 or/23-36  
 38 13 and 22 and 37

#### **Appendix 4. Search strategy - PsycINFO, (1806 to June 2017)**

1 exp Breast Neoplasms/  
 2 exp Breast/  
 3 exp Neoplasms/  
 4 2 and 3  
 5 (breast\$ adj5 (neoplas\$ or cancer\$ or tumo?r\$ or carcinoma\$ or  
 adenocarcinoma\$ or sarcoma\$ or dcis or ductal or infiltrat\$ or intraducta\$ or lobular  
 or medullary or malignan\$ or lymphoma)).tw.  
 6 (mammar\$ adj5 (neoplas\$ or cancer\$ or tumo?r\$ or carcinoma\$ or  
 adenocarcinoma\$ or sarcoma\$ or dcis or ductal or infiltrat\$ or intraducta\$ or lobular  
 or medullary or malignan\$ or lymphoma)).tw.  
 7 or/1,4-6  
 8 exp Behavior Therapy/  
 9 exp Cognitive Therapy/

- 10 Psychotherapy/  
 11 exp Adaptive Behavior/  
 12 Psychophysiology/  
 13 exp cognitive therapy/  
 14 (cogniti\$ adj3 (behavio\$ or therap\$ or remedation or restructur\$ or  
 rehabilitat\$ or interven\$ or program\$ or psychotherap\$ or treatment\$ or approach\$ or  
 technique\$)).tw.  
 15 (behavio?r\$ adj3 (modification\$ or therap\$ or rehabilitat\$ or interven\$ or  
 program\$ or psychotherap\$ or treatment\$ or approach\$ or remedation or  
 technique\$)).tw.  
 16 (cognitive-behavior\$ or mindfulness or CBT or DBT or metacognitive or meta-  
 cognitive).tw.  
 17 ((multi systemic or multisystemic) adj2 therap\$).tw.  
 18 ((aversive or aversion or biofeedback\$ or feedback\$ or desensiti?ation or  
 relaxation or meditat\$) adj3 (therap\$ or interven\$ or program\$ or treatment\$ or  
 approach\$ or technique\$)).tw.  
 19 (social skills adj3 train\$).tw.  
 20 or/8-19  
 21 ((singl\$ or doubl\$ or trebl\$ or tripl\$) adj (blind\$ or mask\$)).mp.  
 22 (random\$ adj5 (assign\$ or allocat\$)).mp.  
 23 randomi\$.mp.  
 24 crossover.mp.  
 25 or/21-24  
 26 7 and 20 and 25

**Appendix 5. Search Strategy - PubMed [Excluding MEDLINE] (1946 –June  
 2017)**

- #1 Search "Breast Neoplasms"[Mesh]  
 #2 Search "Neoplasms, Ductal, Lobular, and Medullary"[Mesh]  
 #3 Search ((breast\*[Text Word] OR mammar\*[Text Word])) AND (neoplas\*[Text

Word] OR cancer\*[Text Word] OR tumor\*[Text Word] OR tumour[Text Word] OR carcinoma\*[Text Word] OR adenocarcinoma\*[Text Word] OR sarcoma\*[Text Word] OR dcis[Text Word] OR ductal[Text Word] OR infiltrat\*[Text Word] OR intraductal\*[Text Word] OR lobular[Text Word] OR medullary[Text Word] OR malignan\*[Text Word] OR lymphoma[Text Word])

#4 Search ("Breast"[Mesh]) AND "Neoplasms"[Mesh]

#5 Search (#1 or #2 or #3 or #4)

#6 Search "Behavior Therapy"[Mesh]

#7 Search (cogniti\*[Text Word]) AND (behavio\*[Text Word] OR therap\*[Text Word] OR remedation[Text Word] OR restructur\*[Text Word] OR rehabilitat\*[Text Word] OR interven\*[Text Word] OR program\*[Text Word] OR psychotherap\*[Text Word] OR treatment\*[Text Word] OR approach\*[Text Word] OR technique\*[Text Word])

#8 Search ((behavior\*[Text Word] OR behaviour\*[Text Word])) AND (modification\*[Text Word] OR therap\*[Text Word] OR rehabilitat\*[Text Word] OR interven\*[Text Word] OR program\*[Text Word] OR psychotherap\*[Text Word] OR treatment\*[Text Word] OR approach\*[Text Word] OR remedation[Text Word] OR technique\*[Text Word])

#9 Search (cognitive-behavio\*[Text Word] OR mindfulness[Text Word] OR CBT[Text Word] OR DBT[Text Word] OR metacognitive[Text Word] OR meta-cognitive[Text Word])

#10 Search (('multi systemic"[Text Word] OR multisystemic[Text Word])) AND therap\*[Text Word]

#11 Search "Psychotherapy"[Mesh:NoExp]

#12 Search "Imagery (Psychotherapy)"[Mesh:NoExp]

#13 Search "Psychotherapy, Rational-Emotive"[Mesh:NoExp]

#14 Search "Feedback, Psychological"[Mesh:NoExp]

#15 Search "Biofeedback, Psychology"[Mesh]

#16 Search ((aversive[Text Word] OR aversion[Text Word] OR biofeedback\*[Text Word] OR feedback\*[Text Word] OR desensitization[Text Word] OR desensitisation[Text Word] OR relaxation[Text Word] OR meditat\*[Text Word])) AND

(therap\*[Text Word] OR interven\*[Text Word] OR program\*[Text Word] OR treatment\*[Text Word] OR approach\*[Text Word] OR technique\*[Text Word])

#17 Search ("social skills"[Text Word]) AND train\*[Text Word]

#18 Search (#6 or #7 or #8 or #9 or #10 or #11 or #12 or #13 or #14 or #15 or #16 or #17)

#19 Search ((randomized controlled trial[pt]) OR (controlled clinical trial[pt]) OR (randomized[tiab]) OR (placebo[tiab]) OR (drug therapy[sh]) OR (randomly[tiab]) OR (trial[tiab]) OR (groups[tiab])) NOT (animals[mh] NOT humans[mh])

#20 Search (#5 and #18 and #19)

#21 Search ("1946/06/13"[Date - Create] : "2017/06/14"[Date - Create])

#22 Search (#20 and #21)
